# Supplementary material for: Delayed enhancement cardiovascular magnetic resonance assessment of non-ischaemic cardiomyopathies
Source: Oxford University Press journal article supplement (doi:10.1093/eurheartj/ehi258), 2005-04-14
Supplement: ehi258_Supplementary_Data.zip [file ehi258_Supplementary_Data.zip]

# HYPERENHANCEMENT PATTERNS

## Ischemic

### A. Subendocardial Infarct

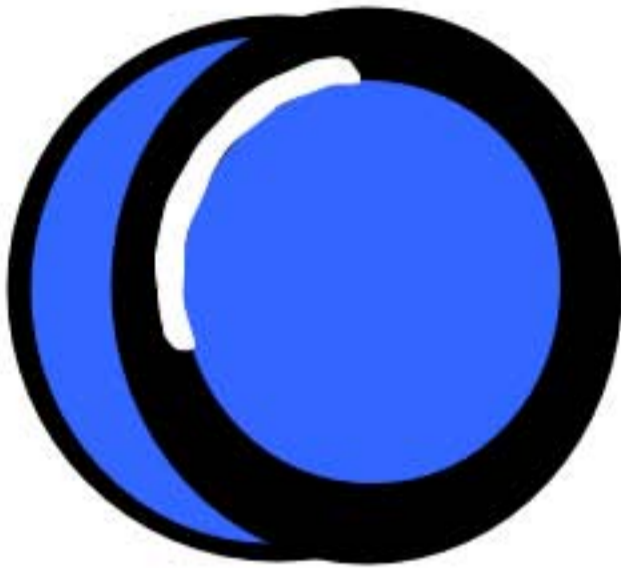

### B. Transmural Infarct

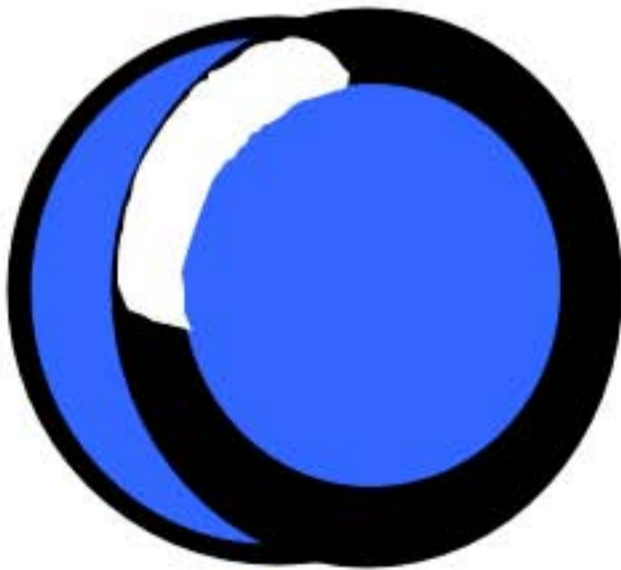

## Nonischemic

### A. Mid-wall HE

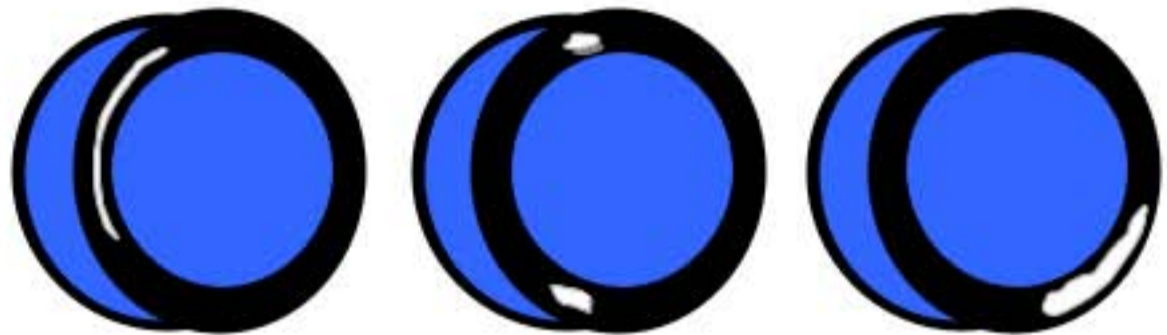

- Idiopathic Dilated Cardiomyopathy
- Myocarditis

- Hypertrophic Cardiomyopathy
- Right ventricular pressure overload (e.g. congenital heart disease, pulmonary HTN)

- Sarcoidosis
- Myocarditis
- Anderson-Fabry
- Chagas Disease

### B. Epicardial HE

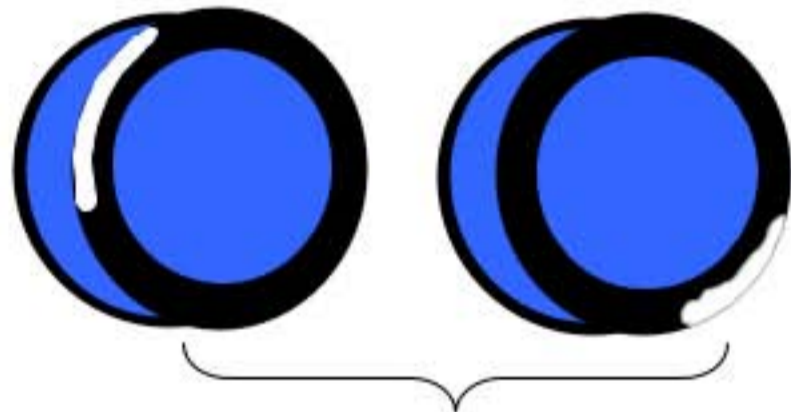

- Sarcoidosis, Myocarditis, Anderson-Fabry, Chagas Disease

### C. Global Endocardial HE

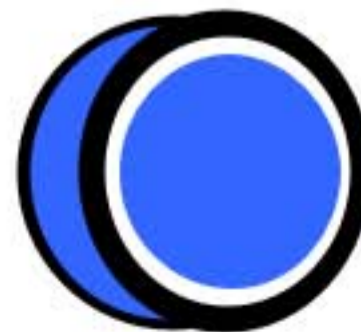

- Amyloidosis, Systemic Sclerosis, Post cardiac transplantation

Figure 13
