# Supplementary figures and images for: Delayed enhancement cardiovascular magnetic resonance assessment of non-ischaemic cardiomyopathies
Source: Oxford University Press journal article supplement (doi:10.1093/eurheartj/ehi258), 2005-04-14

Figure 3

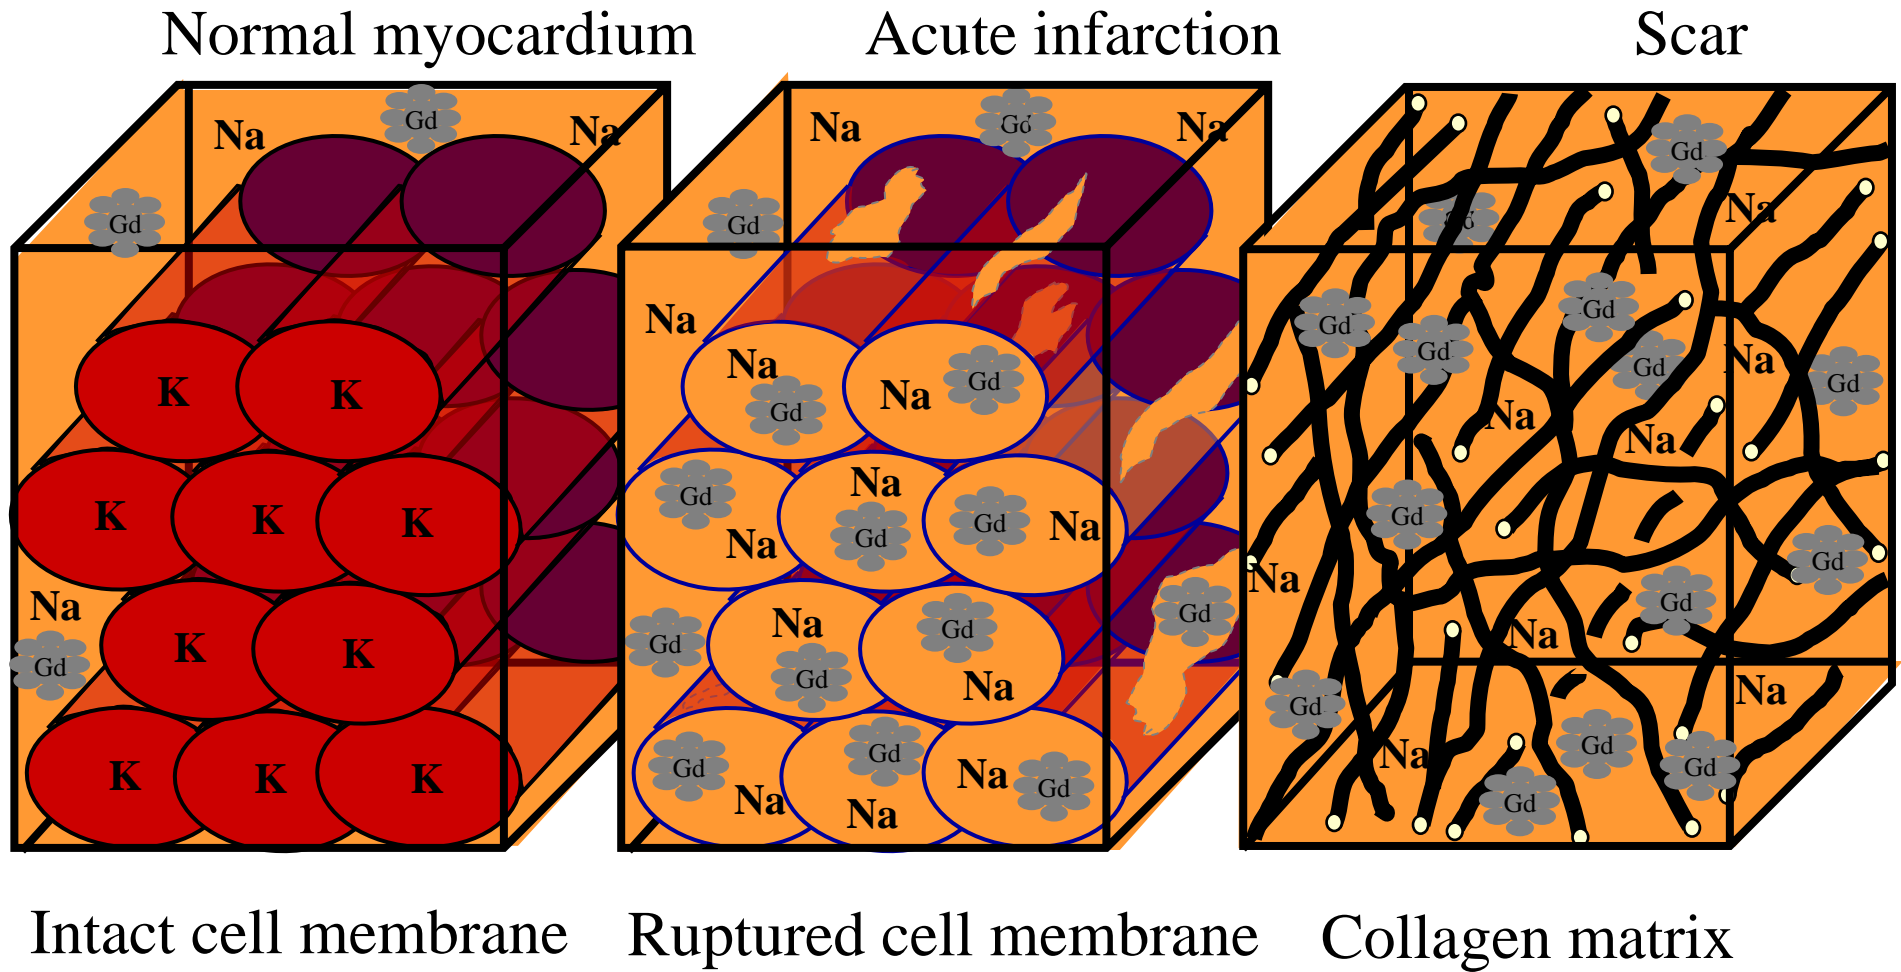

Supplement: ehi258_Supplementary_Data.zip [file ehi258_Supplementary_Data.zip]
